# Supplementary material
Source: publisher figshare collection journal article supplement (https://sage.figshare.com/ndownloader/files/17535002)
Supplement: Supplementary file 1 [file 17535002]

## British Lung Foundation patient experience questions

How would you describe your experience of attending the TMW group?

In your opinion, what is the best thing about it?

Is there anything you find difficult about the TMW group?

Have you made new friends?

Is there anything you can do now which you couldn't do before attending the group?

Has attending the TMW group helped any of your other health problems?

Do you feel more able to cope with your shortness of breath now you have attended the TMW group?

Would you recommend the TMW group to other respiratory patients?
